# Supplementary material for: Photochromism and photoresponsive luminescence in naphthalenediimide coordination polymers with high thermostability
Source: Royal Society of Chemistry journal article supplement (doi:10.1039/d0ce01317j), 2020-10-20
Supplement: d0ce01317j1.pdf [file d0ce01317j1.pdf]

# Photochromism and photoresponsive luminescence in naphthalenediimide coordination polymers with high thermostability

Le-Tian Zhang,<sup>a</sup> Bin Xia,<sup>a</sup> Xia-Zhang,<sup>c</sup> Sha Lu,<sup>a</sup> Xian-Xian Zhou,<sup>a</sup> Quan-Wen Li<sup>b\*</sup> and Qing-Lun Wang<sup>a\*</sup>

- a. College of Chemistry, Key Laboratory of Advanced Energy Materials Chemistry (Ministry of Education), Nankai University, Tianjin 300071, P. R. China.
- b. School of Materials Science and Engineering, National Institute for Advanced Materials, Tianjin Key Laboratory of Metal and Molecule-Based Material Chemistry, Nankai University, Tianjin 300350, P. R. China
- c. School of Chemical Engineering and Technology, Hebei University of Technology, Tianjin, 300130, P. R. China.

## Corresponding to

E-mail: [liqw@nankai.edu.cn](mailto:liqw@nankai.edu.cn) (Q.-W. Li), [wangql@nankai.edu.cn](mailto:wangql@nankai.edu.cn) (Q.-L. Wang)

**Table S1a** Selected bond length and angles of compound **1**.

|                                        |             |                          |             |
|----------------------------------------|-------------|--------------------------|-------------|
| Zn2—O8                                 | 1.9359(13)  | Zn1—N8 <sup>#2</sup>     | 2.0411 (16) |
| Zn2—O1 <sup>#1</sup>                   | 1.9659 (14) | Zn1—N7 <sup>#2</sup>     | 2.0528 (16) |
| Zn2—N1                                 | 2.0358 (16) | O1—Zn2 <sup>#3</sup>     | 1.9659 (14) |
| Zn2—N2                                 | 2.0387 (16) | N8—Zn1 <sup>#4</sup>     | 2.0411 (16) |
| Zn1—O5                                 | 1.9556 (14) | N7—Zn1 <sup>#4</sup>     | 2.0528 (16) |
| Zn1—O4                                 | 1.9544 (14) |                          |             |
| O8—Zn2—N1                              | 116.24 (6)  | C15—O5—Zn1               | 109.74 (13) |
| O8—Zn2—N2                              | 108.72 (6)  | C14—O4—Zn1               | 125.27 (14) |
| O1 <sup>#1</sup> —Zn2—N1               | 102.62 (6)  | C1—O1—Zn2 <sup>#3</sup>  | 123.70 (15) |
| O1 <sup>#1</sup> —Zn2—N2               | 110.84 (6)  | C49—N8—Zn1 <sup>#4</sup> | 114.27 (17) |
| N1—Zn2—N2                              | 114.06 (6)  | C50—N8—Zn1 <sup>#4</sup> | 127.36 (13) |
| O5—Zn1—N8 <sup>#2</sup>                | 121.52 (6)  | C57—N1—Zn2               | 117.50 (13) |
| O5—Zn1—N7 <sup>#2</sup>                | 111.81 (6)  | C53—N1—Zn2               | 123.80 (13) |
| O4—Zn1—O5                              | 98.62 (6)   | C72—N7—Zn1 <sup>#4</sup> | 122.23 (12) |
| O4—Zn1—N8 <sup>#2</sup>                | 102.86 (6)  | C76—N7—Zn1 <sup>#4</sup> | 119.48 (13) |
| O4—Zn1—N7 <sup>#2</sup>                | 114.98 (6)  | C29—N2—Zn2               | 121.08 (13) |
| N8 <sup>#2</sup> —Zn1—N7 <sup>#2</sup> | 106.84 (6)  | C33—N2—Zn2               | 120.20 (13) |
| C28—O8—Zn2                             | 114.35 (12) |                          |             |

Symmetry codes: #1  $x+1, y-2, z$ ; #2  $x-1, y+2, z+1$ ; #3  $x-1, y+2, z$ ; #4  $x+1, y-2, z-1$ .

**Table S1b** Selected bond length and angles of compound **2**.

|                                        |             |                                        |             |
|----------------------------------------|-------------|----------------------------------------|-------------|
| Cd1—O5                                 | 2.3989 (14) | Cd1—N1                                 | 2.3214 (17) |
| Cd1—O8 <sup>#1</sup>                   | 2.4161 (14) | Cd1—N4 <sup>#1</sup>                   | 2.3231 (17) |
| Cd1—O7 <sup>#1</sup>                   | 2.4982 (15) | O7—Cd1 <sup>#2</sup>                   | 2.4981 (15) |
| Cd1—O9                                 | 2.3133 (15) | O8—Cd1 <sup>#2</sup>                   | 2.4161 (14) |
| Cd1—O6                                 | 2.4939 (15) | N4—Cd1 <sup>#2</sup>                   | 2.3231 (17) |
| O5—Cd1—O6                              | 53.67 (5)   | N1—Cd1—O8 <sup>#1</sup>                | 88.43(5)    |
| O5—Cd1—O7 <sup>#1</sup>                | 140.63 (5)  | N1—Cd1—N4 <sup>#1</sup>                | 176.17 (6)  |
| O5—Cd1—O8 <sup>#1</sup>                | 87.42 (5)   | N4 <sup>#1</sup> —Cd1—O5               | 89.34 (5)   |
| O6—Cd1—O7 <sup>#1</sup>                | 165.45 (5)  | N4 <sup>#1</sup> —Cd1—O6               | 91.71(5)    |
| O8 <sup>#1</sup> —Cd1—O6               | 141.07 (5)  | N4 <sup>#1</sup> —Cd1—O7 <sup>#1</sup> | 91.23 (5)   |
| O8 <sup>#1</sup> —Cd1—O7 <sup>#1</sup> | 53.26 (5)   | N4 <sup>#1</sup> —Cd1—O8 <sup>#1</sup> | 88.49 (5)   |
| O9—Cd1—O5                              | 137.39 (5)  | C38—O7—Cd1 <sup>#2</sup>               | 90.62 (12)  |
| O9—Cd1—O6                              | 83.90(5)    | C25—O5—Cd1                             | 93.24 (12)  |
| O9—Cd1—O7 <sup>#1</sup>                | 81.61 (5)   | C38—O8—Cd1 <sup>#2</sup>               | 90.62(12)   |
| O9—Cd1—O8 <sup>#1</sup>                | 134.76 (5)  | C25—O6—Cd1                             | 89.1 (3)    |
| O9—Cd1—N1                              | 87.40 (6)   | C5—N1—Cd1                              | 121.57(14)  |
| O9—Cd1—N4 <sup>#1</sup>                | 96.39 (5)   | C1—N1—Cd1 <sup>#1</sup>                | 120.40(13)  |
| N1—Cd1—O5                              | 88.25 (5)   | C21—N4—Cd1 <sup>#4</sup>               | 116.68(13)  |
| N1—Cd1—O6                              | 89.25 (5)   | C24—N4—Cd1 <sup>#2</sup>               | 125.03 (13) |
| N1—Cd1—O7 <sup>#1</sup>                | 88.75 (6)   |                                        |             |

Symmetry codes: #1  $-x+3/2, -y+1, z+1/2$ ; #2  $-x+3/2, -y+1, z-1/2$ .

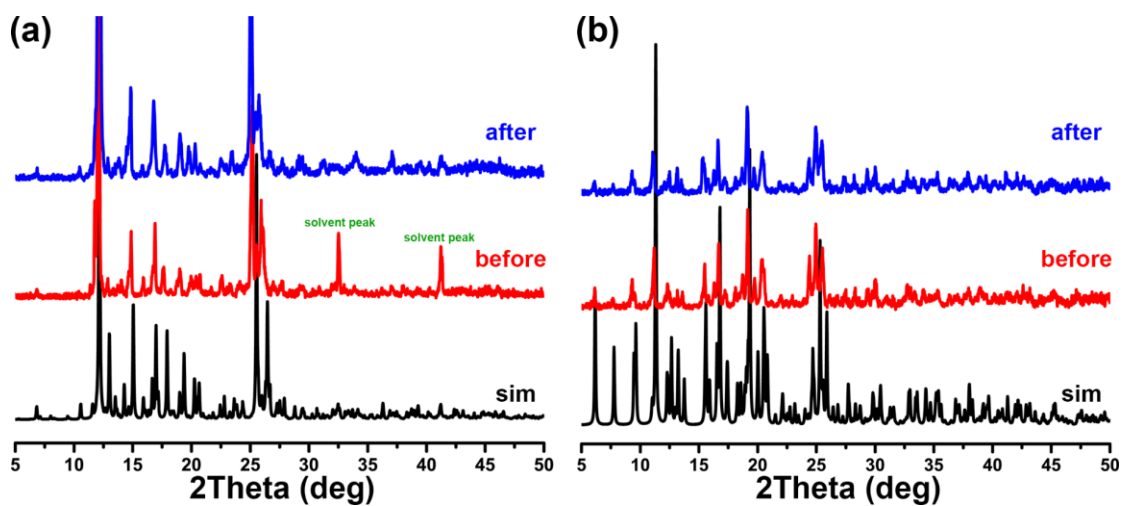

Figure S1 PXRD patterns of compound 1 (a) and 2 (b) before and after irradiation.

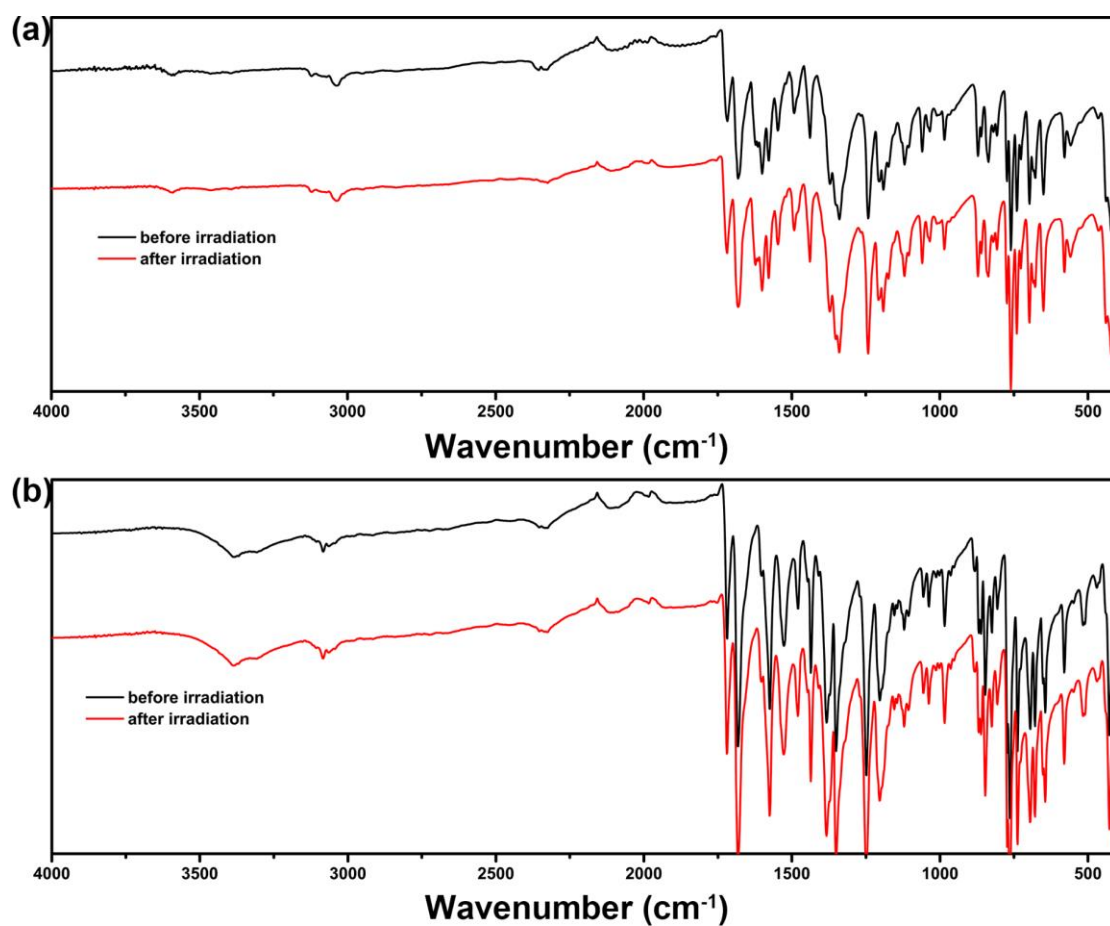

Figure S2 FT-IR spectra of compound 1 (a) and 2 (b) before and after irradiation.

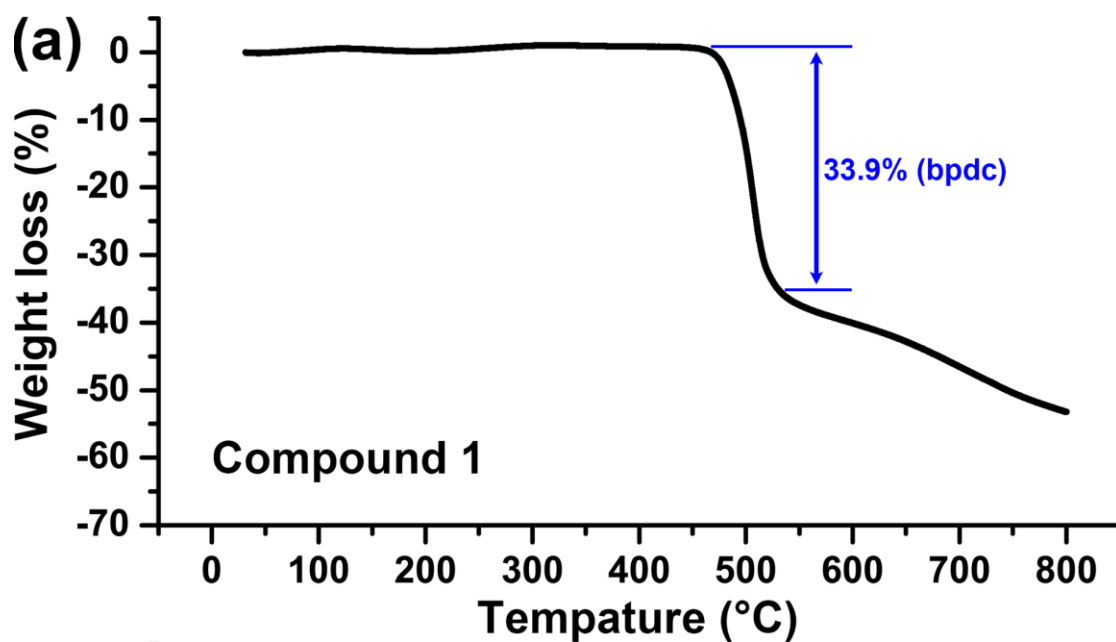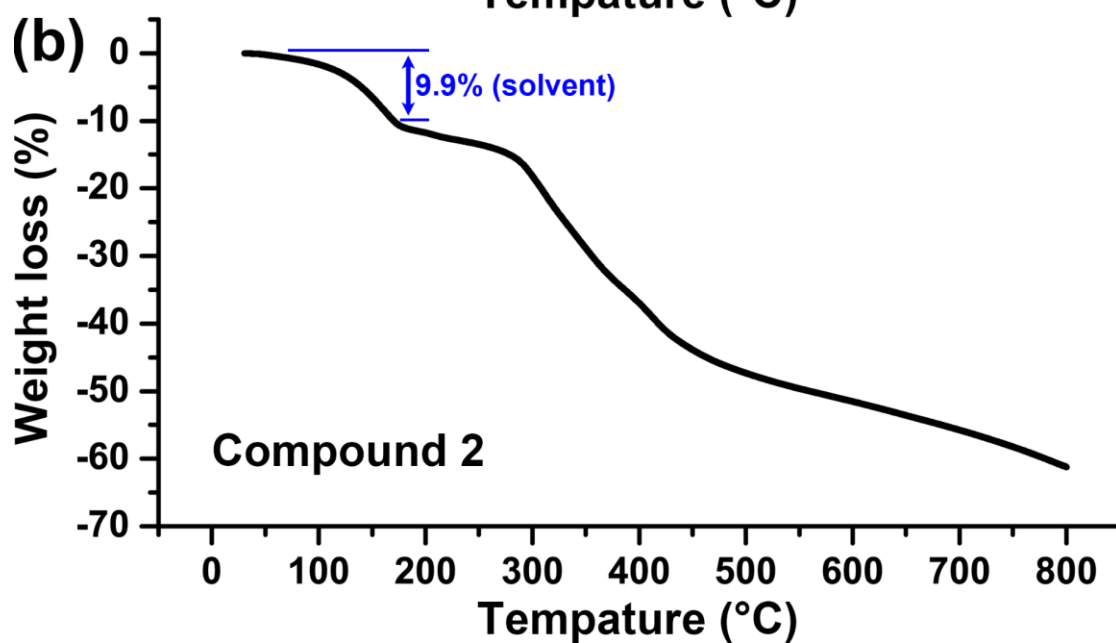

Figure S3 TG analysis of compound 1 (a) and 2 (b).

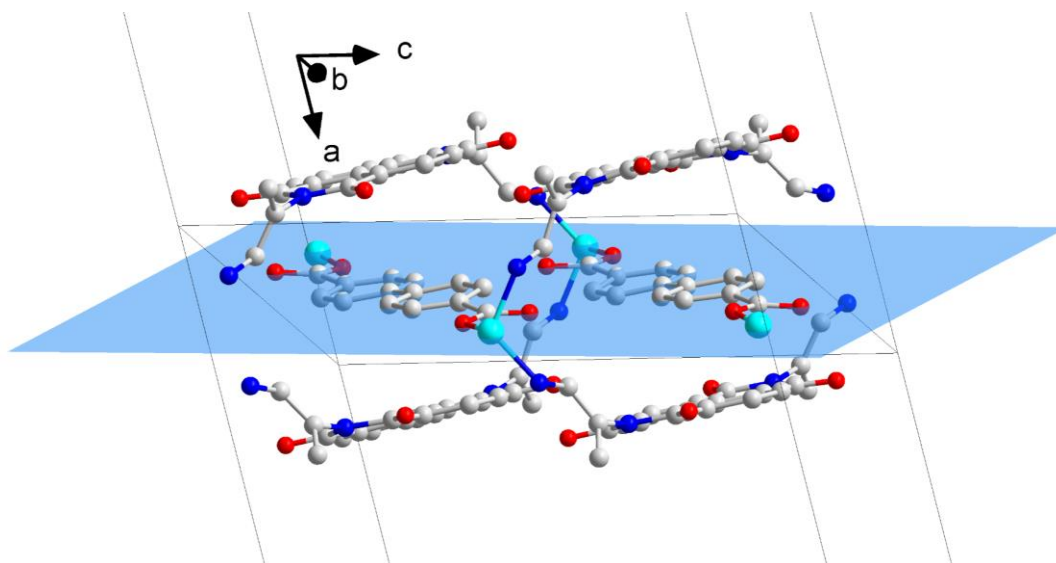

**Figure S4** (4 2 0) crystal plane in compound 1. Legends: Zn (cyan), O (red), N (blue), C (gray).

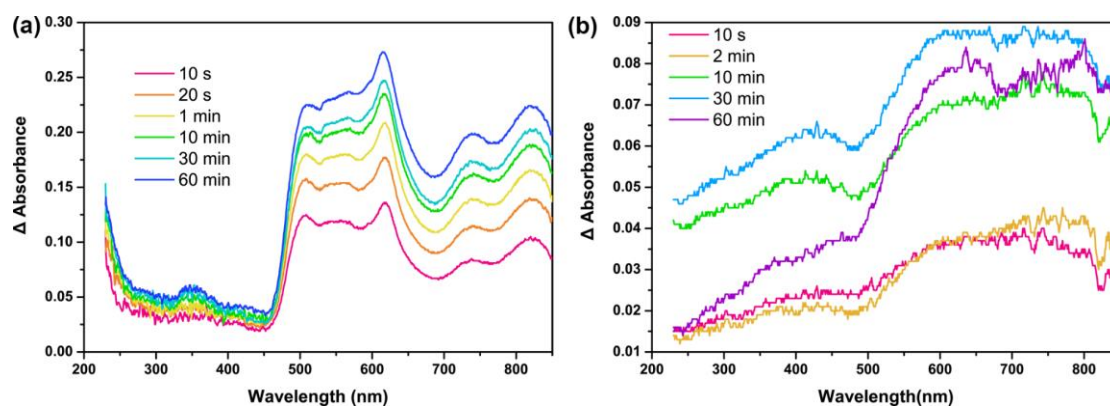

**Figure S5** Variation of time-dependent UV-vis spectra of compound 1 (a) and 2 (b).
